# Supplementary material
Source: PubMed Central journal article supplement (PMC4070884)
Supplement: NIHMS61334-supplement-si20060626_035.pdf [file NIHMS61334-supplement-si20060626_035.pdf]

**The NMR Structure of an Internal Loop from 23S Ribosomal RNA  
Differs from its Structure in Crystals of 50S Ribosomal Subunits**

*Neelaabh Shankar, Scott D. Kennedy, Gang Chen, Thomas R. Krugh, Douglas H. Turner*

Supporting Information

**Table S1. List of Distance and Dihedral Angle Restraints Used for Modeling.**Hydrogen bonds for the stem region

| <i>Atom 1</i> | <i>Atom 2</i> | <i>Lower limit</i> | <i>Upper limit</i> |
|---------------|---------------|--------------------|--------------------|
| G1H1          | C18N3         | 1.800              | 2.500              |
| G1O6          | C18H42        | 1.800              | 2.500              |
| G1H22         | C18O2         | 1.800              | 2.500              |
| G2H1          | C17N3         | 1.800              | 2.500              |
| G2O6          | C17H42        | 1.800              | 2.500              |
| G2H22         | C17O2         | 1.800              | 2.500              |
| C3N3          | G16H1         | 1.800              | 2.500              |
| C3H42         | G16O6         | 1.800              | 2.500              |
| C3O2          | G16H22        | 1.800              | 2.500              |
| G7H1          | C12N3         | 1.800              | 2.500              |
| G7O6          | C12H42        | 1.800              | 2.500              |
| G7H22         | C12O2         | 1.800              | 2.500              |
| A8H62         | U11O4         | 1.800              | 2.500              |
| A8N1          | U11H3         | 1.800              | 2.500              |
| C9N3          | G10H1         | 1.800              | 2.500              |
| C9H42         | G10O6         | 1.800              | 2.500              |
| C9O2          | G10H22        | 1.800              | 2.500              |

NOESY restraints from 100 ms spectrum at 25 °C

| <i>Proton 1</i> | <i>Proton 2</i> | <i>Lower limit</i> | <i>Upper limit</i> | <i>NMR Distance</i> |
|-----------------|-----------------|--------------------|--------------------|---------------------|
| G1H2'           | G1H1'           | 2.30               | 4.27               | 3.29                |
| G1H2'           | G1H8            | 3.24               | 6.02               | 4.63                |
| G1H2'           | G2H8            | 2.05               | 3.81               | 2.93                |
| G1H8            | G1H3'           | 2.11               | 3.92               | 3.02                |
| G2H8            | G2H3'           | 2.23               | 4.14               | 3.19                |
| G2H1'           | G2H2'           | 1.82               | 3.38               | 2.60                |

|       |       |      |      |      |
|-------|-------|------|------|------|
| G2H8  | G1H1' | 2.58 | 4.79 | 3.68 |
| G2H8  | G1H3' | 1.95 | 3.62 | 2.78 |
| G2H8  | G2H1' | 2.97 | 5.51 | 4.24 |
| G2H8  | G2H2' | 2.18 | 4.05 | 3.11 |
| C3H1' | C3H3' | 2.33 | 4.32 | 3.33 |
| C3H5  | G2H2' | 2.44 | 4.53 | 3.49 |
| C3H6  | G2H1' | 2.54 | 4.71 | 3.62 |
| C3H6  | G2H2' | 1.77 | 3.29 | 2.53 |
| C3H6  | C3H5  | 1.71 | 3.18 | 2.45 |
| C3H6  | C3H1' | 2.46 | 4.56 | 3.51 |
| C3H6  | C3H2' | 2.54 | 4.72 | 3.63 |
| C3H6  | C3H3' | 2.09 | 3.88 | 2.98 |
| C3H6  | U4H5  | 3.36 | 6.24 | 4.80 |
| U4H1' | U4H3' | 2.04 | 3.79 | 2.91 |
| U4H1' | U4H4' | 2.18 | 4.06 | 3.12 |
| U4H6  | C3H3' | 2.20 | 4.09 | 3.15 |
| U4H1' | U4H2' | 1.73 | 3.22 | 2.48 |
| U4H6  | C3H1' | 2.54 | 4.72 | 3.63 |
| U4H6  | C3H2' | 1.80 | 3.35 | 2.57 |
| U4H6  | U4H4' | 2.98 | 5.53 | 4.25 |
| U4H6  | U4H1' | 2.21 | 4.11 | 3.16 |
| U4H6  | U4H2' | 2.70 | 5.01 | 3.86 |
| U4H6  | U4H3' | 1.81 | 3.36 | 2.59 |
| U4H6  | U4H5  | 1.70 | 3.17 | 2.44 |
| A5H1' | A5H4' | 2.19 | 4.07 | 3.13 |
| A5H1' | A5H2' | 2.00 | 3.71 | 2.85 |
| A5H3' | A5H1' | 2.36 | 4.38 | 3.37 |
| A5H3' | A5H8  | 2.20 | 4.09 | 3.14 |
| A5H3' | A6H8  | 4.14 | 7.70 | 5.92 |
| A5H8  | U4H3' | 2.15 | 3.99 | 3.07 |
| A5H8  | U4H1' | 2.76 | 5.13 | 3.94 |

|       |        |      |      |      |
|-------|--------|------|------|------|
| A5H8  | U4H2'  | 1.88 | 3.49 | 2.69 |
| A5H8  | A5H4'  | 2.42 | 4.49 | 3.46 |
| A5H8  | A5H1'  | 2.57 | 4.78 | 3.67 |
| A5H8  | A5H2'  | 2.08 | 3.87 | 2.98 |
| A6H1' | A6H3'  | 2.47 | 4.58 | 3.52 |
| A6H1' | A6H4'  | 2.94 | 5.46 | 4.20 |
| A6H8  | A6H3'  | 2.65 | 4.93 | 3.79 |
| A6H1' | A6H2'  | 2.28 | 4.24 | 3.26 |
| A6H8  | A5H1'  | 2.38 | 4.44 | 3.41 |
| A6H8  | A5H2'  | 2.02 | 3.76 | 2.89 |
| A6H8  | A6H1'  | 2.50 | 4.65 | 3.57 |
| A6H8  | A6H4'  | 3.48 | 6.46 | 4.97 |
| A6H8  | G7H8   | 2.35 | 4.36 | 3.35 |
| G7H2' | G7H1'  | 1.69 | 3.14 | 2.41 |
| G7H8  | A6H3'  | 1.81 | 3.36 | 2.58 |
| G7H8  | G7H1'  | 2.69 | 5.00 | 3.84 |
| G7H8  | A6H1'  | 3.09 | 5.73 | 4.41 |
| G7H8  | G7H2'  | 2.41 | 4.47 | 3.44 |
| A8H2  | C9H1'  | 2.22 | 4.13 | 3.18 |
| A8H8  | A8H3'  | 2.09 | 3.89 | 2.99 |
| A8H8  | C9H5   | 3.02 | 5.60 | 4.31 |
| A8H1' | G7H2'  | 2.80 | 5.21 | 4.01 |
| A8H1' | A8H3'  | 2.27 | 4.22 | 3.25 |
| A8H1' | A8H2'  | 1.68 | 3.11 | 2.39 |
| A8H2  | C12H1' | 1.92 | 3.57 | 2.75 |
| A8H8  | G7H2'  | 1.80 | 3.34 | 2.57 |
| A8H8  | G7H8   | 3.58 | 6.65 | 5.11 |
| A8H8  | A8H1'  | 2.44 | 4.54 | 3.49 |
| A8H8  | A8H2'  | 2.35 | 4.37 | 3.36 |
| C9H1' | A8H2'  | 2.24 | 4.16 | 3.20 |
| C9H1' | C9H3'  | 2.03 | 3.77 | 2.90 |

|        |        |      |      |      |
|--------|--------|------|------|------|
| C9H1'  | C9H2'  | 1.68 | 3.11 | 2.39 |
| C9H1'  | C9H5   | 2.95 | 5.48 | 4.22 |
| C9H5   | A8H3'  | 2.65 | 4.92 | 3.79 |
| C9H5   | A8H2'  | 2.16 | 4.01 | 3.09 |
| C9H5   | C9H2'  | 3.07 | 5.70 | 4.39 |
| C9H6   | A8H3'  | 2.30 | 4.27 | 3.28 |
| C9H6   | A8H1'  | 2.59 | 4.81 | 3.70 |
| C9H6   | A8H2'  | 1.75 | 3.26 | 2.51 |
| C9H6   | C9H1'  | 2.38 | 4.41 | 3.39 |
| C9H6   | C9H2'  | 2.50 | 4.64 | 3.57 |
| C9H6   | C9H5   | 1.70 | 3.16 | 2.43 |
| G10H1' | G10H2' | 1.77 | 3.29 | 2.53 |
| G10H1' | U11H5  | 3.05 | 5.66 | 4.35 |
| U11H6  | U11H2' | 2.11 | 3.92 | 3.01 |
| U11H6  | U11H3' | 1.88 | 3.50 | 2.69 |
| U11H1' | U11H3' | 2.42 | 4.49 | 3.46 |
| U11H1' | U11H2' | 1.80 | 3.35 | 2.57 |
| U11H1' | C12H5  | 3.46 | 6.43 | 4.94 |
| U11H5  | G10H2' | 2.09 | 3.88 | 2.99 |
| U11H6  | G10H1' | 2.56 | 4.76 | 3.66 |
| U11H6  | G10H2' | 1.62 | 3.00 | 2.31 |
| U11H6  | U11H1' | 2.16 | 4.02 | 3.09 |
| U11H6  | U11H5  | 1.73 | 3.21 | 2.47 |
| C12H1' | C12H3' | 2.52 | 4.67 | 3.60 |
| C12H6  | U11H2' | 1.71 | 3.17 | 2.44 |
| C12H6  | C12H3' | 2.10 | 3.90 | 3.00 |
| C12H6  | C12H5  | 1.72 | 3.19 | 2.45 |
| C12H1' | C12H2' | 1.50 | 2.79 | 2.14 |
| C12H5  | U11H2' | 2.33 | 4.32 | 3.33 |
| C12H5  | U11H5  | 2.39 | 4.44 | 3.42 |
| C12H6  | U11H1' | 2.44 | 4.54 | 3.49 |

|        |        |      |      |      |       |
|--------|--------|------|------|------|-------|
| C12H6  | C12H1' | 2.34 | 4.34 | 3.34 |       |
| G13H1' | C12H2' | 2.21 | 4.11 | 3.16 |       |
| G13H1' | G13H3' | 2.22 | 4.12 | 3.17 |       |
| G13H3' | G13H2' | 1.85 | 3.43 | 2.64 |       |
| G13H3' | G13H4' | 1.75 | 3.25 | 2.50 |       |
| G13H8  | A8H2   | 4.58 | 8.50 | 6.54 |       |
| G13H8  | C12H2' | 1.84 | 3.41 | 2.63 |       |
| G13H8  | C12H3' | 1.98 | 3.68 | 2.83 |       |
| G13H8  | G13H2' | 2.14 | 3.97 | 3.06 |       |
| G13H8  | G13H3' | 1.93 | 3.58 | 2.75 |       |
| G13H8  | G13H4' | 2.27 | 4.22 | 3.25 |       |
| G13H1' | G13H2' | 1.71 | 3.17 | 2.44 |       |
| G13H1' | G13H4' | 2.11 | 3.92 | 3.01 |       |
| G13H8  | C12H1' | 2.70 | 5.01 | 3.85 |       |
| G13H8  | G13H1' | 2.44 | 4.53 | 3.48 |       |
| A14H1' | A14H3' | 2.96 | 5.49 | 4.22 |       |
| A14H2' | A14H3' | 1.80 | 3.35 | 2.58 |       |
| A14H2' | A14H4' | 2.24 | 4.15 | 3.20 |       |
| A14H8  | G13H3' | 2.94 | 5.46 | 4.20 |       |
| A14H8  | A14H4' | 2.35 | 4.36 | 3.36 |       |
| A14H1' | A14H4' | 2.36 | 4.38 | 3.37 |       |
| A14H1' | A14H2' | 1.79 | 3.32 | 2.55 |       |
| A14H2  | A6H1'  | 2.05 | 3.81 | 2.93 |       |
| A14H2  | A15H1' | 1.88 | 3.48 | 2.68 |       |
| A14H2  | A15H8  | 2.49 | 4.62 | 3.55 |       |
| A14H2' | A15H3' | 2.37 | 5.52 | 3.94 | ± 40% |
| A14H8  | G13H1' | 2.73 | 5.08 | 3.91 |       |
| A14H8  | G13H2' | 1.95 | 3.62 | 2.79 |       |
| A14H8  | A14H3' | 2.00 | 3.72 | 2.86 |       |
| A14H8  | A14H1' | 2.38 | 4.42 | 3.40 |       |
| A14H8  | A14H2' | 2.35 | 4.37 | 3.36 |       |

|        |        |      |      |      |       |
|--------|--------|------|------|------|-------|
| A14H8  | A15H8  | 2.68 | 4.97 | 3.83 |       |
| A15H1' | A15H2' | 1.89 | 3.51 | 2.70 |       |
| A15H8  | A14H3' | 2.12 | 3.94 | 3.03 |       |
| A15H8  | A15H2' | 1.90 | 4.44 | 3.17 | ± 40% |
| A15H1' | A15H3' | 2.30 | 4.27 | 3.28 |       |
| A15H2  | A5H1'  | 2.28 | 4.23 | 3.26 |       |
| A15H2  | G16H1' | 1.91 | 3.55 | 2.73 |       |
| A15H8  | A15H1' | 3.12 | 5.79 | 4.45 |       |
| A15H8  | A15H3' | 1.80 | 3.34 | 2.57 |       |
| G16H1' | A15H2' | 3.08 | 5.73 | 4.40 |       |
| G16H1' | A15H3' | 3.40 | 6.31 | 4.85 |       |
| G16H1' | G16H2' | 1.71 | 3.18 | 2.44 |       |
| G16H1' | C17H5  | 3.06 | 5.68 | 4.37 |       |
| G16H8  | A15H1' | 2.73 | 5.08 | 3.91 |       |
| G16H8  | A15H2' | 1.73 | 3.21 | 2.47 |       |
| G16H8  | A15H3' | 2.05 | 3.80 | 2.93 |       |
| G16H8  | G16H1' | 2.62 | 4.87 | 3.74 |       |
| G16H8  | C17H5  | 3.52 | 6.54 | 5.03 |       |
| C17H1' | C17H3' | 1.63 | 3.81 | 2.72 | ± 40% |
| C17H1' | C17H2' | 1.62 | 3.00 | 2.31 |       |
| C17H5  | G16H2' | 2.07 | 3.84 | 2.95 |       |
| C17H6  | G16H1' | 2.63 | 4.89 | 3.76 |       |
| C17H6  | G16H2' | 1.63 | 3.03 | 2.33 |       |
| C17H6  | C17H1' | 1.95 | 3.62 | 2.79 |       |
| C17H6  | C17H2' | 2.09 | 3.88 | 2.98 |       |
| C17H6  | C17H5  | 1.74 | 3.22 | 2.48 |       |
| C18H6  | C17H2' | 1.73 | 3.21 | 2.47 |       |
| C18H1' | C17H2' | 2.91 | 5.40 | 4.15 |       |
| C18H1' | C18H2' | 1.67 | 3.10 | 2.38 |       |
| C18H6  | C18H1' | 2.43 | 4.52 | 3.48 |       |
| C18H6  | C18H2' | 1.83 | 4.27 | 3.05 | ± 40% |

NOESY distance restraints from 200 ms 30 °C spectrum

|       |        |      |      |      |       |
|-------|--------|------|------|------|-------|
| A5H2  | G13H2' | 2.47 | 5.76 | 4.11 | ± 40% |
| A5H2  | A14H8  | 2.64 | 6.17 | 4.41 | ± 40% |
| A6H2  | G7H1'  | 1.77 | 4.14 | 2.96 | ± 40% |
| A6H2  | A6H1'  | 2.49 | 5.72 | 4.08 | ± 40% |
| A6H2  | A14H1' | 1.54 | 3.60 | 2.57 | ± 40% |
| A8H8  | G7H1'  | 2.05 | 4.78 | 3.42 | ± 40% |
| A8H2  | A8H1'  | 2.61 | 6.09 | 4.36 | ± 40% |
| A14H2 | A6H2   | 3.02 | 7.06 | 5.04 | ± 40% |
| A14H8 | A6H2   | 3.49 | 8.15 | 5.82 | ± 40% |
| A15H8 | A14H1' | 2.03 | 4.74 | 3.38 | ± 40% |
| A15H8 | A14H2' | 1.68 | 3.92 | 2.79 | ± 40% |

SNOESY distance restraints from 150 ms 15 °C spectrum

|        |       |      |      |      |       |
|--------|-------|------|------|------|-------|
| C3H41  | G2H1  | 1.93 | 4.50 | 3.22 | ± 40% |
| U4H1'  | G16H1 | 1.55 | 3.63 | 2.59 | ± 40% |
| G7H1   | U11H3 | 2.67 | 6.23 | 4.45 | ± 40% |
| A8H2   | G7H1  | 1.94 | 4.53 | 3.23 | ± 40% |
| A8H2   | U11H3 | 1.74 | 4.06 | 2.90 | ± 40% |
| A8H1'  | G7H1  | 1.79 | 4.18 | 2.98 | ± 40% |
| C12H41 | U11H3 | 2.22 | 5.19 | 3.71 | ± 40% |
| C12H42 | U11H3 | 2.39 | 5.58 | 3.98 | ± 40% |
| G13H1' | G7H1  | 1.74 | 4.05 | 2.89 | ± 40% |
| G16H1  | G2H1  | 2.18 | 5.09 | 3.64 | ± 40% |
| C17H41 | G16H1 | 2.14 | 5.01 | 3.57 | ± 40% |
| C18H1' | G2H1  | 2.13 | 4.99 | 3.56 | ± 40% |



Dihedral angle restraints***Alpha O3'-P-O5'-C5'; A-form -68***

| <i>Atom 1</i> | <i>Atom 2</i> | <i>Atom 3</i> | <i>Atom 4</i> | <i>Lower</i> | <i>Upper</i> |
|---------------|---------------|---------------|---------------|--------------|--------------|
| G1O3'         | G2P           | G2O5'         | G2C5          | -120         | 120          |
| G2O3'         | C3P           | C3O5'         | C3C5'         | -120         | 120          |
| C3O3'         | U4P           | U4O5'         | U4C5'         | -120         | 120          |
| G7O3'         | A8P           | A8O5'         | A8C5'         | -120         | 120          |
| A8O3'         | C9P           | C9O5'         | C9C5'         | -120         | 120          |
| G10O3'        | U11P          | U11O5'        | U11C5'        | -120         | 120          |
| U11O3'        | C12P          | C12O5'        | C12C5'        | -120         | 120          |
| C12O3'        | G13P          | G13O5'        | G13C5'        | -120         | 120          |
| G16O3'        | C17P          | C17O5'        | C17C5'        | -120         | 120          |
| C17O3'        | C18P          | C18O5'        | C18C5'        | -120         | 120          |

***Beta P-O5'-C5'-C4'; A-form 178***

|      |        |        |        |     |      |
|------|--------|--------|--------|-----|------|
| G2P  | G2O5'  | G2C5'  | G2C4'  | 150 | -150 |
| C3P  | C3O5'  | C3C5'  | C3C4'  | 150 | -150 |
| G7P  | G7O5'  | G7C5'  | G7C4'  | 150 | -150 |
| A8P  | A8O5'  | A8C5'  | A8C4'  | 150 | -150 |
| C9P  | C9O5'  | C9C5'  | C9C4'  | 150 | -150 |
| U11P | U11O5' | U11C5' | U11C4' | 150 | -150 |
| C12P | C12O5' | C12C5' | C12C4' | 150 | -150 |
| G16P | G16O5' | G16C5' | G16C4' | 150 | -150 |
| C17P | C17O5' | C17C5' | C17C4' | 150 | -150 |
| C18P | C18O5' | C18C5' | C18C4' | 150 | -150 |

***Gamma O5'-C5'-C4'-C3'; A-form 54***

|       |       |       |       |    |    |
|-------|-------|-------|-------|----|----|
| G1O5' | G1C5' | G1C4' | G1C3' | 30 | 90 |
| G2O5' | G2C5' | G2C4' | G2C3' | 30 | 90 |
| C3O5' | C3C5' | C3C4' | C3C3' | 30 | 90 |
| G7O5' | G7C5' | G7C4' | G7C3' | 30 | 90 |

|        |        |        |        |    |    |
|--------|--------|--------|--------|----|----|
| A8O5'  | A8C5'  | A8C4'  | A8C3'  | 30 | 90 |
| C9O5'  | C9C5'  | C9C4'  | C9C3'  | 30 | 90 |
| G10O5' | G10C5' | G10C4' | G10C3' | 30 | 90 |
| U11O5' | U11C5' | U11C4' | U11C3' | 30 | 90 |
| C12O5' | C12C5' | C12C4' | C12C3' | 30 | 90 |
| G16O5' | G16C5' | G16C4' | G16C3' | 30 | 90 |
| C17O5' | C17C5' | C17C4' | C17C3' | 30 | 90 |
| C18O5' | C18C5' | C18C4' | C18C3' | 30 | 90 |

*Delta C5'-C4'-C3'-O3'; A-form 82*

|        |        |        |        |    |     |
|--------|--------|--------|--------|----|-----|
| G1C5'  | G1C4'  | G1C3'  | G1O3'  | 55 | 115 |
| G2C5'  | G2C4'  | G2C3'  | G2O3'  | 55 | 115 |
| C3C5'  | C3C4'  | C3C3'  | C3O3'  | 55 | 115 |
| U4C5'  | U4C4'  | U4C3'  | U4O3'  | 55 | 115 |
| A5C5'  | A5C4'  | A5C3'  | A5O3'  | 55 | 190 |
| A6C5'  | A6C4'  | A6C3'  | A6O3'  | 55 | 115 |
| G7C5'  | G7C4'  | G7C3'  | G7O3'  | 55 | 115 |
| A8C5'  | A8C4'  | A8C3'  | A8O3'  | 55 | 115 |
| C9C5'  | C9C4'  | C9C3'  | C9O3'  | 55 | 190 |
| G10C5' | G10C4' | G10C3' | G10O3' | 55 | 115 |
| U11C5' | U11C4' | U11C3' | U11O3' | 55 | 115 |
| C12C5' | C12C4' | C12C3' | C12O3' | 55 | 115 |
| G13C5' | G13C4' | G13C3' | G13O3' | 55 | 190 |
| A14C5' | A14C4' | A14C3' | A14O3' | 55 | 115 |
| A15C5' | A15C4' | A15C3' | A15O3' | 55 | 115 |
| G16C5' | G16C4' | G16C3' | G16O3' | 55 | 115 |
| C17C5' | C17C4' | C17C3' | C17O3' | 55 | 115 |
| C18C5' | C18C4' | C18C3' | C18O3' | 55 | 190 |

*Epsilon C4'-C3'-O3'-P; A-form -153*

|       |       |       |     |      |      |
|-------|-------|-------|-----|------|------|
| G1C4' | G1C3' | G1O3' | G2P | -180 | -100 |
|-------|-------|-------|-----|------|------|

|        |        |        |      |      |      |
|--------|--------|--------|------|------|------|
| G2C4'  | G2C3'  | G2O3'  | C3P  | -180 | -100 |
| C3C4'  | C3C3'  | C3O3'  | U4P  | -180 | -100 |
| G7C4'  | G7C3'  | G7O3'  | A8P  | -180 | -100 |
| A8C4'  | A8C3'  | A8O3'  | C9P  | -180 | -100 |
| G10C4' | G10C3' | G10O3' | U11P | -180 | -100 |
| U11C4' | U11C3' | U11O3' | C12P | -180 | -100 |
| C12C4' | C12C3' | C12O3' | G13P | -180 | -100 |
| G16C4' | G16C3' | G16O3' | C17P | -180 | -100 |
| C17C4' | C17C3' | C17O3' | C18P | -180 | -100 |

*Zeta C3'-O3'-P-O5'; A-form -71*

|        |        |      |        |      |     |
|--------|--------|------|--------|------|-----|
| G1C3'  | G1O3'  | G2P  | G2O5'  | -120 | 120 |
| G2C3'  | G2O3'  | C3P  | C3O5'  | -120 | 120 |
| C3C3'  | C3O3'  | U4P  | U4O5'  | -120 | 120 |
| G7C3'  | G7O3'  | A8P  | A8O5'  | -120 | 120 |
| A8C3'  | A8O3'  | C9P  | C9O5'  | -120 | 120 |
| G10C3' | G10O3' | U11P | U11O5' | -120 | 120 |
| U11C3' | U11O3' | C12P | C12O5' | -120 | 120 |
| C12C3' | C12O3' | G13P | G13O5' | -120 | 120 |
| G16C3' | G16O3' | C17P | C17O5' | -120 | 120 |
| C17C3' | C17O3' | C18P | C18O5' | -120 | 120 |

*Chi Glycosidic torsions; A-form -158*

|       |       |      |      |     |      |
|-------|-------|------|------|-----|------|
| G1O4' | G1C1' | G1N9 | G1C4 | 150 | -130 |
| G2O4' | G2C1' | G2N9 | G2C4 | 150 | -130 |
| C3O4' | C3C1' | C3N1 | C3C2 | 150 | -130 |
| U4O4' | U4C1' | U4N1 | U4C2 | 150 | -30  |
| A5O4' | A5C1' | A5N9 | A5C4 | 150 | -30  |
| A6O4' | A6C1' | A6N9 | A6C4 | 150 | -30  |
| G7O4' | G7C1' | G7N9 | G7C4 | 150 | -130 |
| A8O4' | A8C1' | A8N9 | A8C4 | 150 | -130 |

|        |        |       |       |     |      |
|--------|--------|-------|-------|-----|------|
| C9O4'  | C9C1'  | C9N1  | C9C2  | 150 | -130 |
| G10O4' | G10C1' | G10N9 | G10C4 | 150 | -130 |
| U11O4' | U11C1' | U11N1 | U11C2 | 150 | -130 |
| C12O4' | C12C1  | C12N1 | C12C2 | 150 | -130 |
| G13O4' | G13C1' | G13N9 | G13C4 | 150 | -30  |
| A14O4' | A14C1' | A14N9 | A14C4 | 150 | -30  |
| A15O4' | A15C1' | A15N9 | A15C4 | 150 | -30  |
| G16O4' | G16C1' | G16N9 | G16C4 | 150 | -130 |
| C17O4' | C17C1' | C17N1 | C17C2 | 150 | -130 |
| C18O4' | C18C1' | C18N1 | C18C2 | 150 | -130 |

**Table S2.** Summary of NOE distance restraints.

| Residue | Total | Intra residue | Inter residue |
|---------|-------|---------------|---------------|
| G1      | 9     | 3             | 6             |
| G2      | 16    | 4             | 12            |
| C3      | 16    | 5             | 11            |
| U4      | 16    | 8             | 8             |
| A5      | 16    | 7             | 9             |
| A6      | 18    | 7             | 11            |
| G7      | 18    | 3             | 15            |
| A8      | 25    | 6             | 19            |
| C9      | 18    | 7             | 11            |
| G10     | 8     | 1             | 7             |
| U11     | 21    | 6             | 15            |
| C12     | 20    | 5             | 15            |
| G13     | 19    | 9             | 10            |
| A14     | 26    | 11            | 15            |
| A15     | 19    | 5             | 14            |
| G16     | 19    | 2             | 17            |
| C17     | 16    | 5             | 11            |
| C18     | 9     | 3             | 6             |

All restraints: 203

Intra residue: 97

Inter residue: 106

**Table S3.** List of the Chemical Shift assignments at 25°C (exchangeable protons were assigned at 10°C).

|            | H8/H6 | H2/H5 | H1'   | H2'   | H3'   | H4'   | H5'   | H1/H3 | H4/5/6Am     |
|------------|-------|-------|-------|-------|-------|-------|-------|-------|--------------|
| <b>G1</b>  | 7.912 | -     | 5.640 | 4.808 | 4.507 |       | 3.938 | 12.57 |              |
| <b>G2</b>  | 7.477 | -     | 5.873 | 4.579 | 4.532 |       |       | 13.37 |              |
| <b>C3</b>  | 7.394 | 5.109 | 5.465 | 4.623 | 4.273 |       |       |       | 8.247/ 6.817 |
| <b>U4</b>  | 7.841 | 5.519 | 5.489 | 4.012 | 4.518 | 4.376 |       | 11.60 |              |
| <b>A5</b>  | 8.405 | 8.671 | 5.731 | 4.629 | 4.862 | 4.676 |       |       |              |
| <b>A6</b>  | 7.793 | 7.692 | 5.784 | 4.587 | 4.412 | 4.285 |       |       |              |
| <b>G7</b>  | 7.414 | -     | 3.822 | 4.272 | -     | 4.293 |       | 12.35 |              |
| <b>A8</b>  | 7.668 | 7.780 | 5.918 | 4.437 | 4.568 |       |       |       |              |
| <b>C9</b>  | 7.307 | 5.152 | 5.617 | 3.933 | 4.230 |       |       |       |              |
| <b>G10</b> | -     | -     | 5.618 | 4.672 | -     |       |       | 12.95 |              |
| <b>U11</b> | 7.926 | 5.005 | 5.639 | 4.614 | 4.472 |       |       | 14.46 |              |
| <b>C12</b> | 7.577 | 5.395 | 5.474 | 4.621 | 4.321 |       |       |       | 8.012/ 6.449 |
| <b>G13</b> | 8.067 | -     | 5.557 | 4.423 | 5.010 | 4.536 |       | 10.20 |              |
| <b>A14</b> | 8.128 | 7.844 | 5.849 | 4.949 | 4.681 | 4.601 |       |       |              |
| <b>A15</b> | 7.690 | 7.678 | 5.038 | 4.473 | 4.443 |       |       |       |              |
| <b>G16</b> | 6.842 | -     | 5.254 | 4.373 | 4.328 |       |       | 13.04 |              |
| <b>C17</b> | 7.645 | 5.099 | 5.510 | 4.292 | 4.444 |       |       |       | 8.513/ 6.855 |
| <b>C18</b> | 7.662 | 5.512 | 5.720 | 4.056 | -     | 4.163 |       |       |              |

**Table S4.** List of the H8 and H1' chemical shifts at 25 °C in presence and absence of MgCl<sub>2</sub>. The differences in chemical shifts are shown.

|     | H8<br>+ MgCl <sub>2</sub> | H8<br>- MgCl <sub>2</sub> | Difference<br>in ppm | H1'<br>+ MgCl <sub>2</sub> | H1'<br>- MgCl <sub>2</sub> | Difference in<br>ppm |
|-----|---------------------------|---------------------------|----------------------|----------------------------|----------------------------|----------------------|
| G1  |                           | 7.91                      |                      | 5.58                       | 5.64                       | 0.06                 |
| G2  | 7.48                      | 7.48                      | 0.00                 | 5.85                       | 5.87                       | 0.02                 |
| C3  | 7.40                      | 7.39                      | 0.01                 | 5.46                       | 5.46                       | 0.00                 |
| U4  | 7.85                      | 7.84                      | 0.01                 | 5.48                       | 5.49                       | 0.01                 |
| A5  | 8.40                      | 8.38                      | 0.01                 | 5.73                       | 5.73                       | 0.00                 |
| A6  | 7.80                      | 7.79                      | 0.01                 | 5.75                       | 5.78                       | 0.03                 |
| G7  | 7.49                      | 7.43                      | 0.06                 | 3.81                       | 3.82                       | 0.01                 |
| A8  | 7.65                      | 7.67                      | 0.02                 | 5.91                       | 5.92                       | 0.01                 |
| C9  | 7.31                      | 7.30                      | 0.01                 | 5.59                       | 5.62                       | 0.03                 |
| G10 |                           |                           |                      | 5.57                       | 5.62                       | 0.05                 |
| U11 | 7.94                      | 7.93                      | 0.01                 | 5.61                       | 5.64                       | 0.03                 |
| C12 | 7.59                      | 7.58                      | 0.01                 | 5.49                       | 5.47                       | 0.02                 |
| G13 | 8.12                      | 8.07                      | 0.05                 | 5.55                       | 5.56                       | 0.01                 |
| A14 | 8.12                      | 8.13                      | 0.01                 | 5.83                       | 5.85                       | 0.02                 |
| A15 | 7.68                      | 7.69                      | 0.01                 | 5.09                       | 5.04                       | 0.05                 |
| G16 | 6.86                      | 6.85                      | 0.01                 | 5.26                       | 5.28                       | 0.02                 |
| C17 | 7.65                      | 7.64                      | 0.01                 | 5.50                       | 5.51                       | 0.01                 |
| C18 | 7.66                      | 7.66                      | 0.00                 | 5.69                       | 5.71                       | 0.02                 |

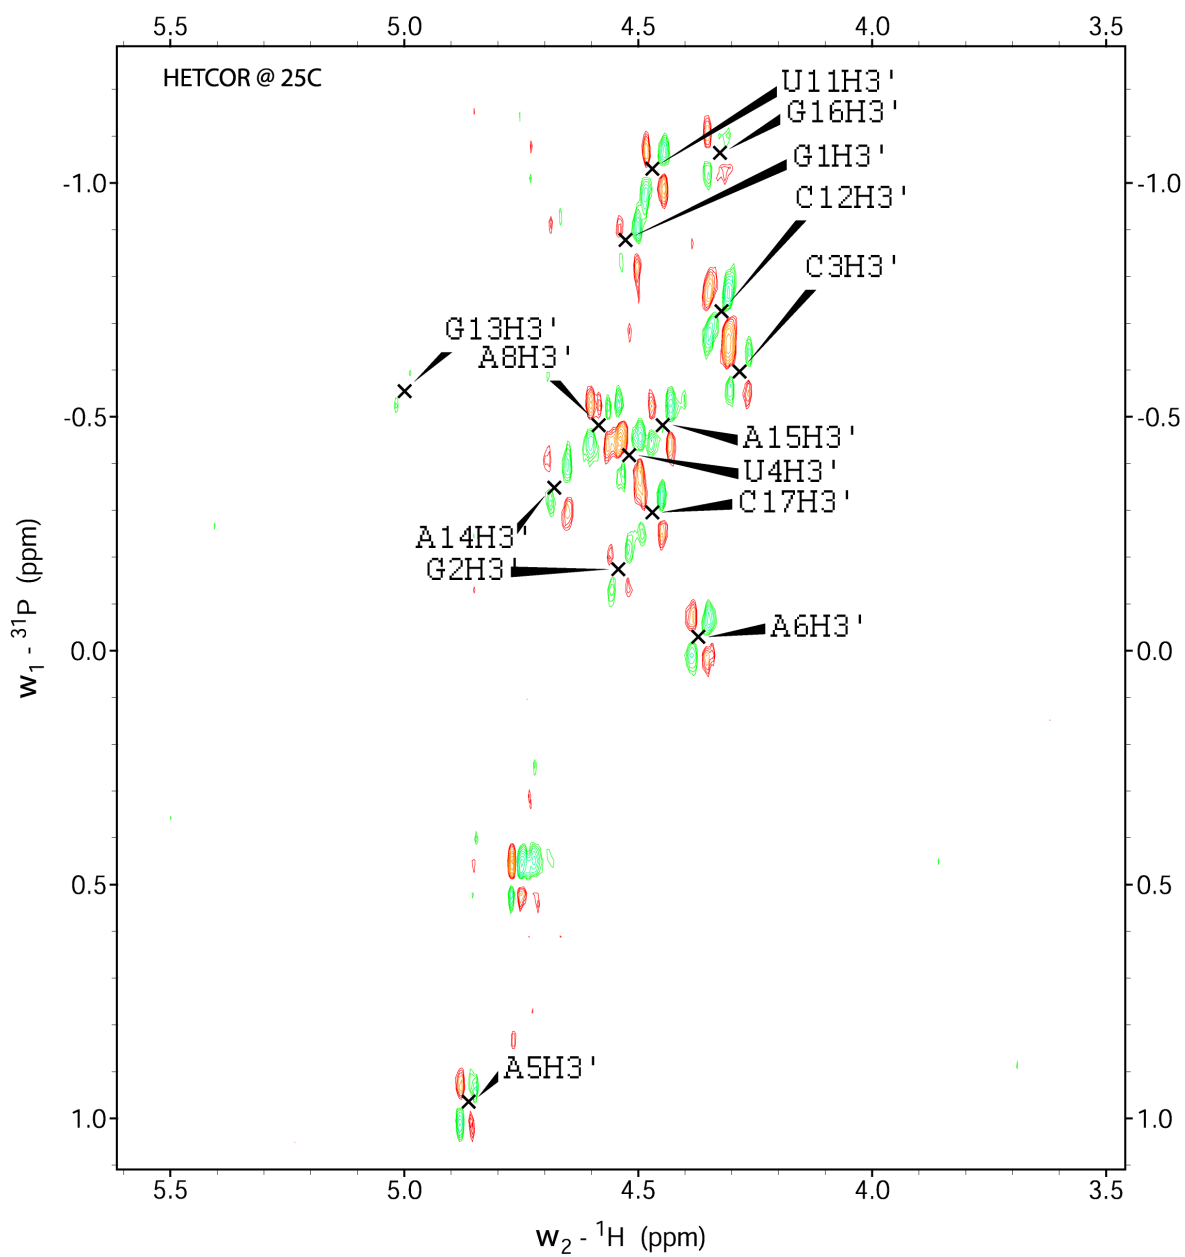Figure S1.  ${}^{31}\text{P}$  HETCOR spectrum at 25 °C.



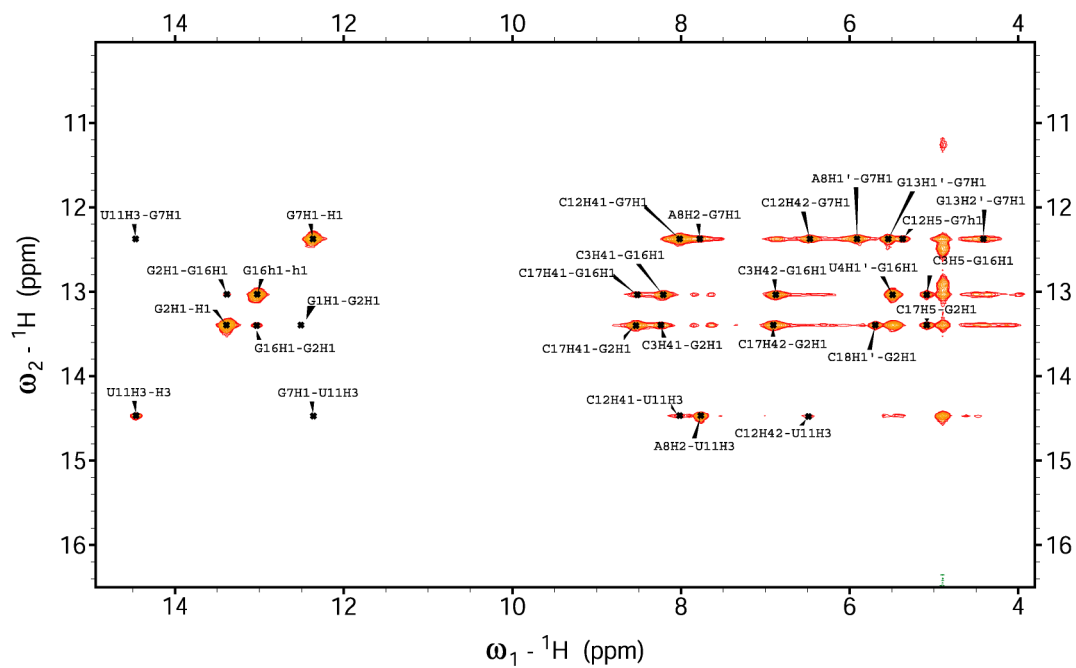

Figure S2. 150 ms SNOESY spectrum at 15 °C.

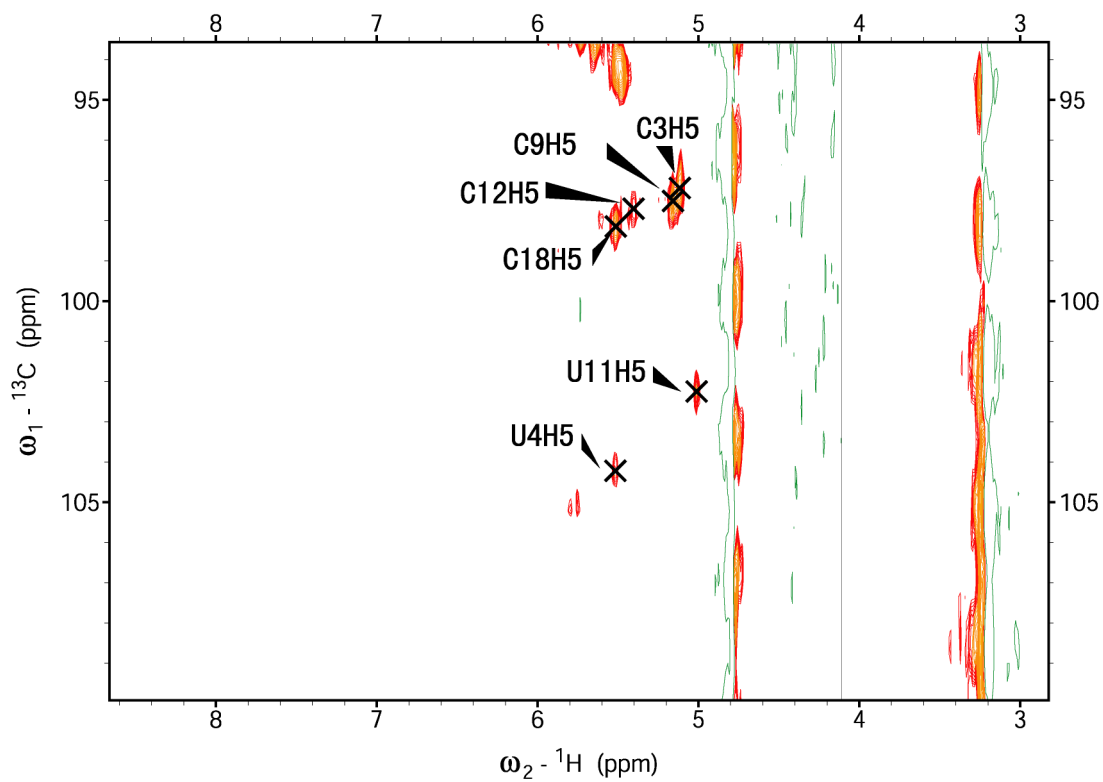

Figure S3. The region showing H5-C5 peaks of Cytosines and Uracils in the HSQC spectrum at 25 °C.

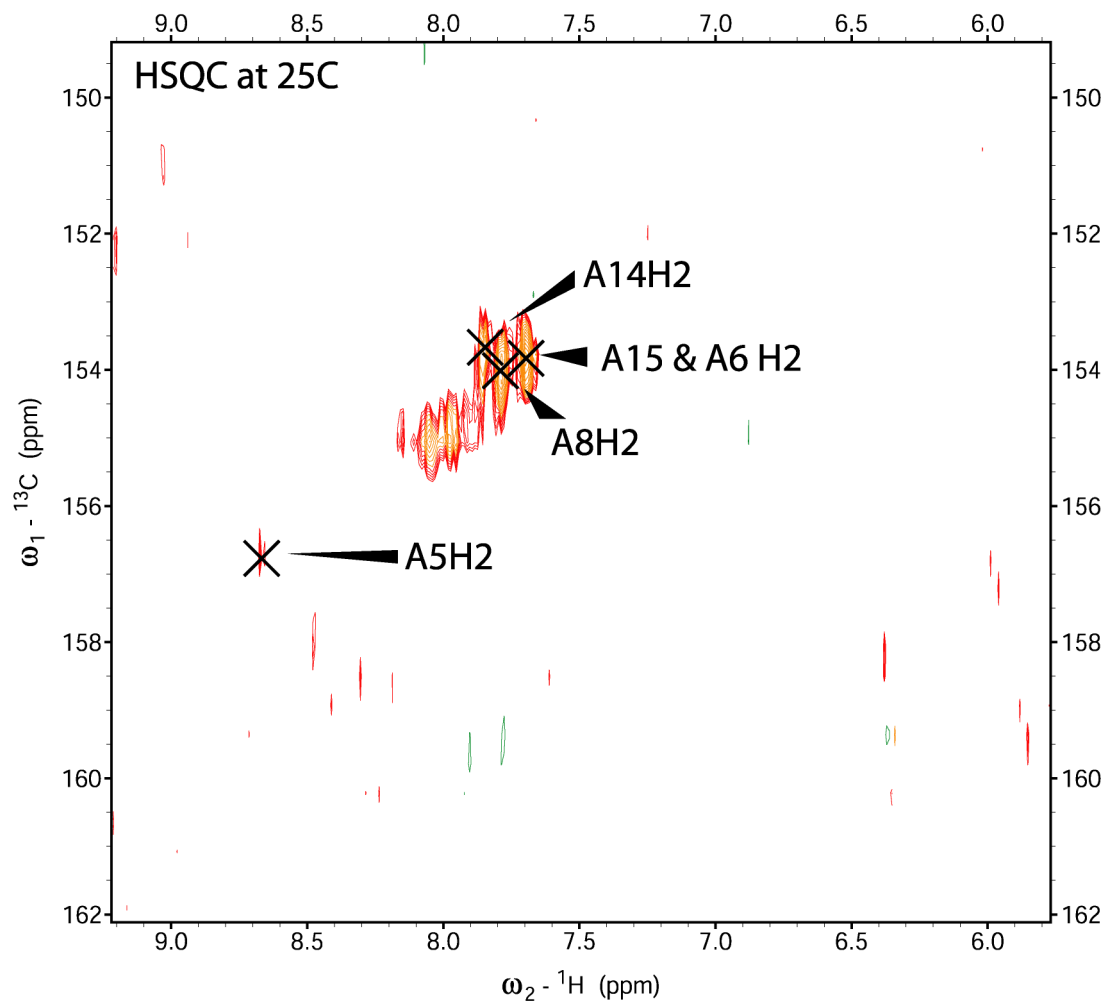

Figure S4. Natural abundance HSQC at 25 °C, showing adenine H2-C2.

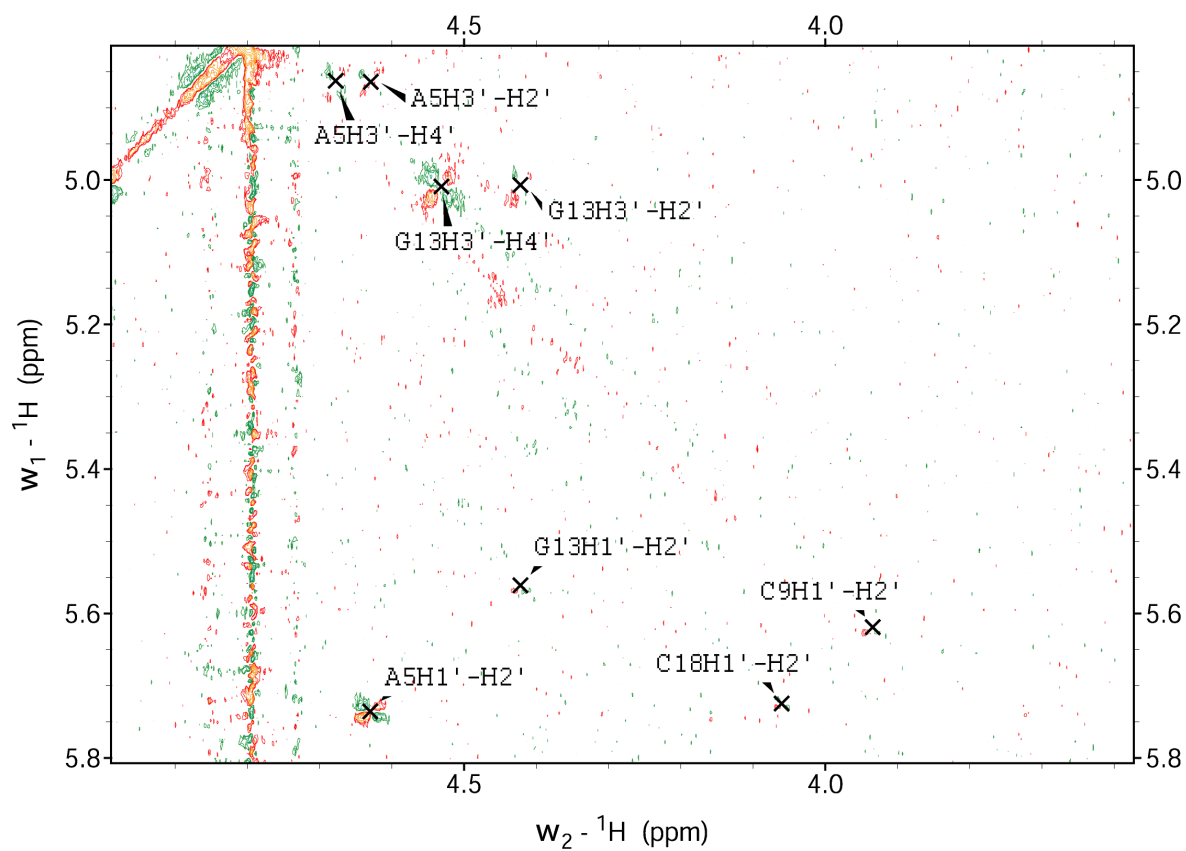

Figure S5. The H1'-H2', H3'- H2' and H3'- H4' region of DQ-COSY spectrum at 25 °C.

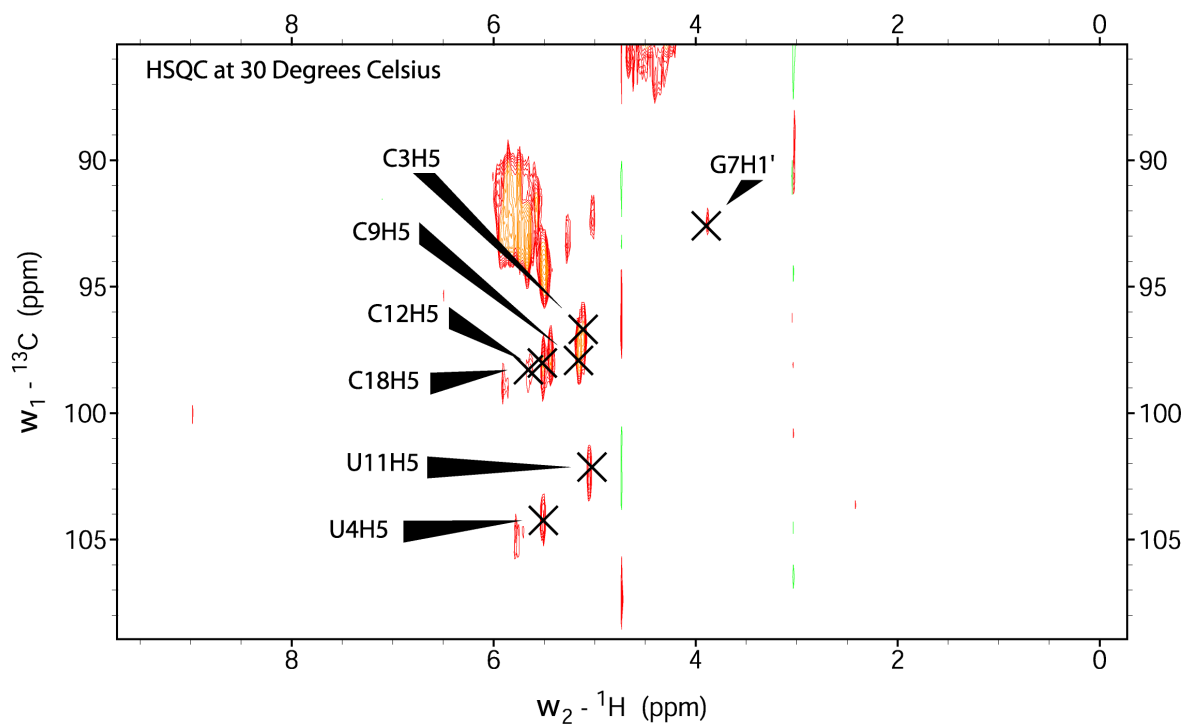

Figure S6. Natural abundance HSQC at 30 °C, showing G7H1'.

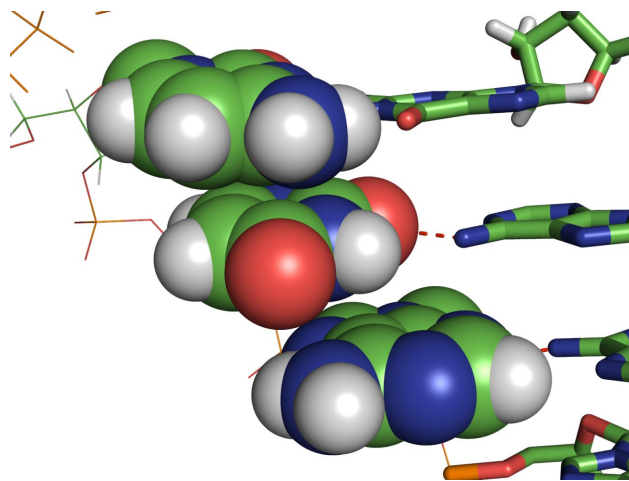

Figure S7. Stacking of U4 carbonyl-4 (red) between C3-amino (blue - top) and A5-amino (blue - bottom).

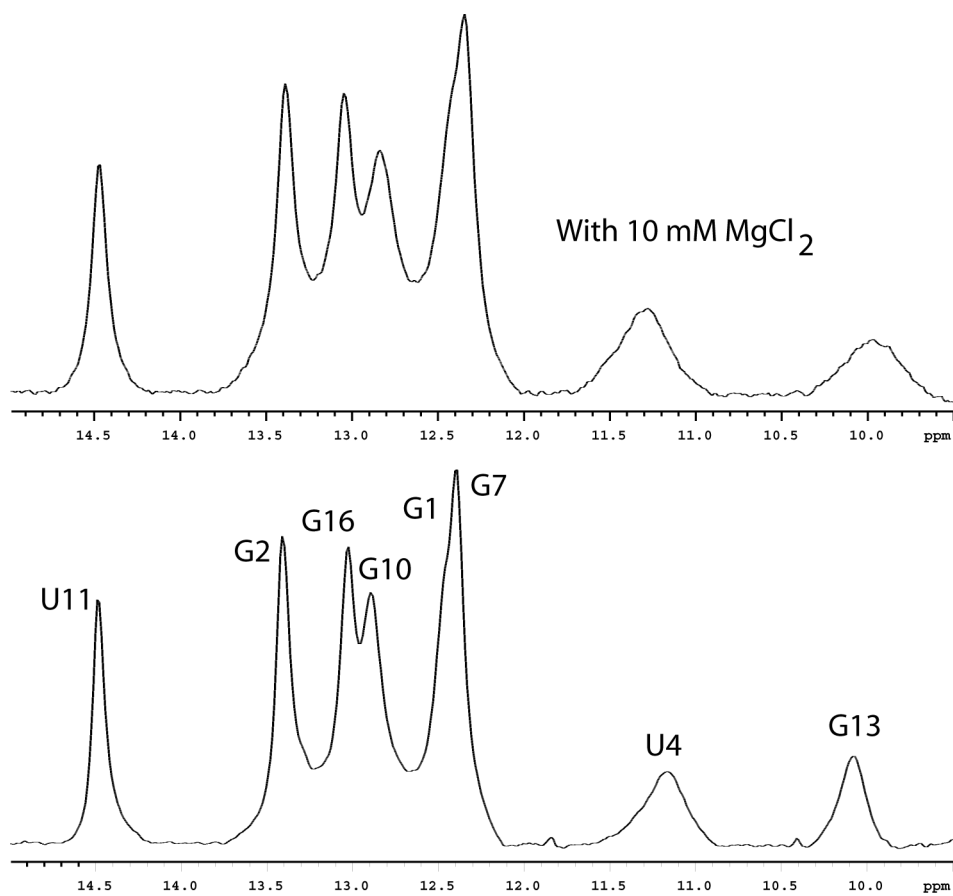

Figure S8. One-dimensional imino proton spectra of 5'GGCUAAGAC/3'CCGAAGCUG at 10 °C (pH 6.5), with and without 10 mM MgCl<sub>2</sub>. Assignments are shown in the bottom spectrum.

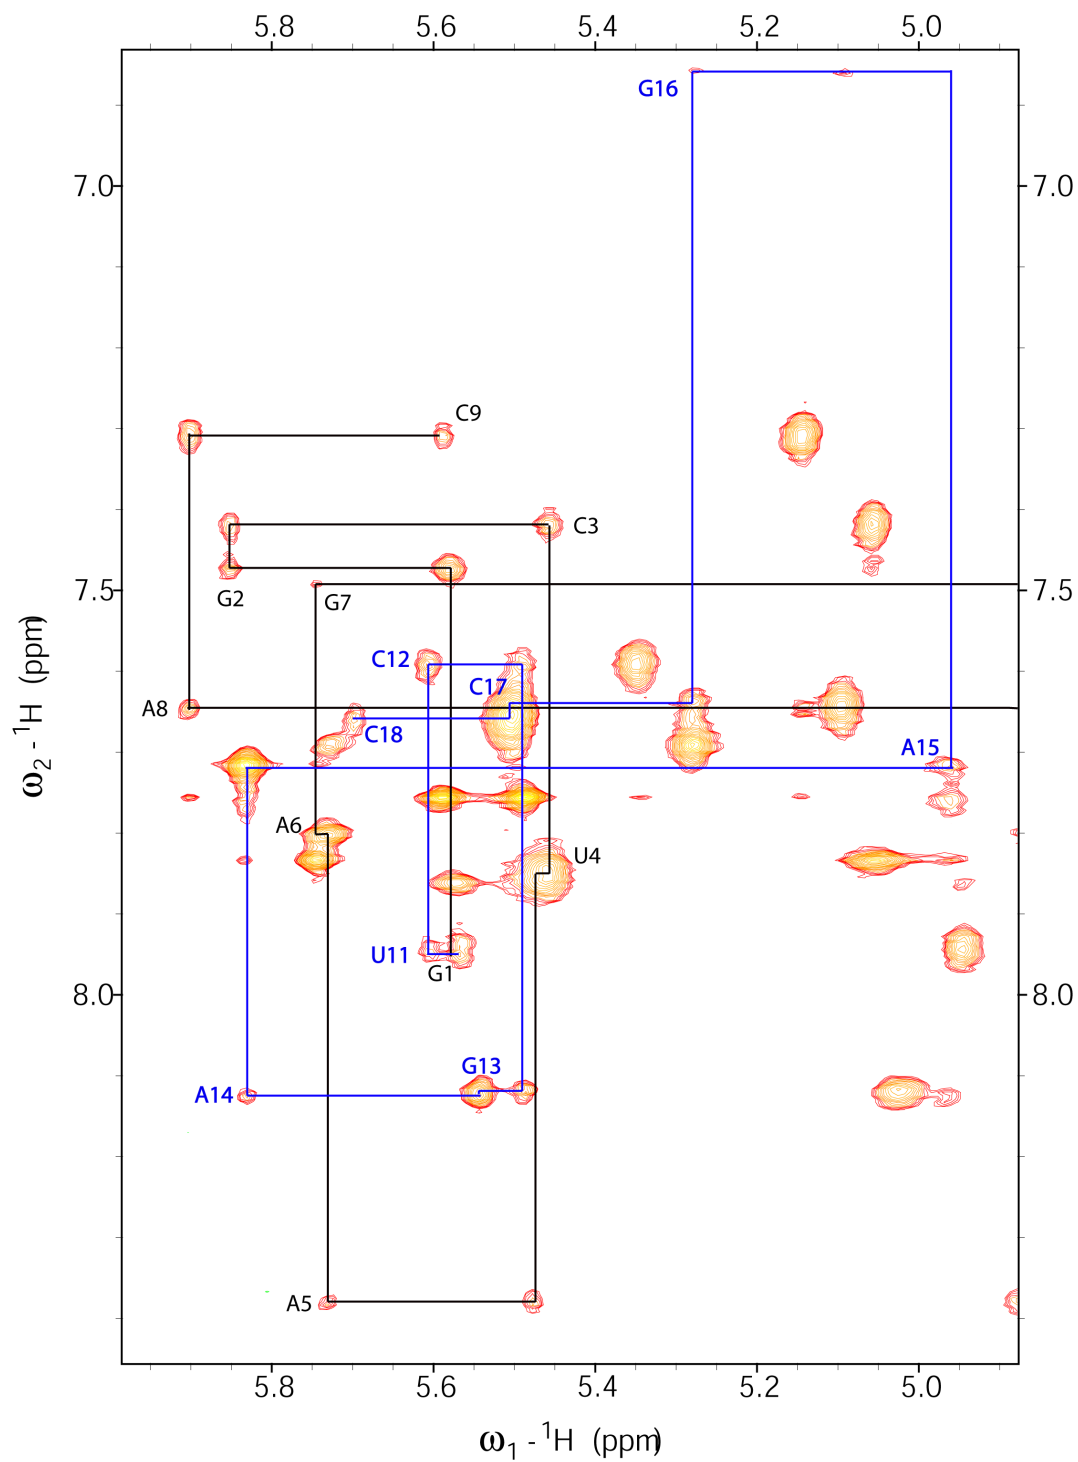

Figure S9. NOESY walk at 25 °C, 200 ms mixing time, for 5'GGCUAAGAC/3'CCGAAGCUG in the presence of 10 mM  $\text{MgCl}_2$ .
